# Supplementary material
Source: PubMed Central journal article supplement (PMC3012962)
Supplement: NIHMS112033-supplement-01.pdf [file NIHMS112033-supplement-01.pdf]

### Legends for Figure S1-S7, Table S1-S3

**Figure S1.** A. Post-sort analysis of Ikaros-GFP defined populations used for global gene array analysis. One of three representative samples is shown. A minimum purity of 95% was required for these studies. B. The HSC and MPP composition of the LSK GFP<sup>neg-lo</sup> sorted population used in our studies is further delineated by expression of Flt3. The LSK GFP<sup>neg-lo</sup>Flt3<sup>neg</sup> (defined by a no-stain control for Flt3) consists of LT-HSC and ST-HSC (A) and is ~ 78% of the whole LSK GFP<sup>neg-lo</sup> population. The LSK GFP<sup>neg-lo</sup>Flt3<sup>lo</sup> consists of MPP (B) and represent ~22% of the whole LSK GFP<sup>neg-lo</sup> population. This is one representative of several independent analyses on the HSC-enriched LSK subset. The LSK GFP<sup>+</sup> Flt3<sup>lo-high</sup> is the LMPP population (C) as described in Yoshida et al., NI 2006.

**Figure S2.** Real-time RT-PCR analysis for lineage-affiliated transcripts used in multiplex single-progenitor studies in Ikaros-GFP defined populations. Genes are indicated on each graph, and colors indicate the lineage affiliation of each gene: lymphoid-blue, myeloid-violet, erythroid-red, stem-orange.

**Figure S3.** Multiplex single-cell RT-PCR analysis of progenitor populations. (A) Examples of primary data generated from each progenitor type is shown (x: 10 cell sample, ∅ No RT control, \* genomic transcript). Lineage-affiliation of transcripts used in this study is shown by the following color designation: lymphoid-blue, myeloid-violet, erythroid- red, stem-yellow. (B) The percent distribution for each lineage-affiliated transcript is shown for each progenitor population. The total number of cells used was;

HSC n=239, LMPP n=211, GMP n=120 and MEP n= 78. Progenitors were isolated from at least two independent sorts and used in 2-4 amplification experiments. Mean +/- SD on percent distribution for the experiments performed per progenitor population is shown.

**Figure S4.** (A) Comparison between two lineage depletion strategies with (i) or without (ii) anti-Mac-1 in the lineage depletion cocktail. Strategy (ii) leaves 2-4 X more cells in the GMP (LK GFP<sup>hi</sup>) compartment. (B) IL-7R $\alpha$  expression in various lineage negative (Lin<sup>-</sup>) populations using strategy (i) for lineage depletion. GMP (LK GFP<sup>hi</sup>) and LSK showed very low level of IL-7R $\alpha$  expression. The significant IL-7R $\alpha$ <sup>+</sup> population detected within the Lin<sup>-</sup>c-Kit<sup>lo</sup>Sca-1<sup>lo</sup> defines the CLP. Another major IL-7R $\alpha$ <sup>+</sup> population was detected within the c-Kit<sup>-</sup>Sca-1<sup>hi</sup> compartment.

**Figure S5.** (A) Clonal analysis of LMPP and GMP for combined T cell and myeloid differentiation potential. Single cells were co-cultured with OP9-DL1 for 18 days before FACS analysis for T cell (Thy.1.2, CD44, CD25) and Myeloid (Mac-1 and Gr-1) markers. The percentage of T cell and myeloid developmental potential exhibited by expanding LMPP and GMP clones is shown. Lineage output of two representative GMP clones with T/myeloid differentiation is shown. (B) The differentiation outcome of intrathymic placement of LMPP (n=25) and GMP (n=1000) is shown at 5 and 21 days post-injection.

**Figure S6.** Hierarchical clustering of up- and down-regulated genes in Ikaros-null HSC (A) and LMPP (B) across WT and KO progenitor populations (HSC, LMPP, GMP and

MEP). The lineage affiliation of deregulated transcripts is shown on the right side of each panel.

**Figure S7.** Multiplex single-cell gene expression analysis of Ikaros–null HSC. (A) Single progenitor analysis for lineage-affiliated transcripts was performed as described in Figure 2. Mutant HSC (n=181) generated from two independent sorts are shown. (B) The percentage of overall lineage transcript distribution as well as that of individual lineage-specific transcripts is provided for WT and mutant populations. Mean +/- SD on percent distribution for experiments performed per progenitor population is shown.

**Table S1.** Limiting dilution analysis of LMPP and GMP lymphoid and myeloid developmental potential. Data from four independent experiments is shown noting the stroma used for each assay. T cell potential was scored from OP9-DL1 culture supplemented with 10 ng/ml SCF, 10 ng/ml Flt3L, and 1 ng/ml IL-7. B and myeloid cell potential were simultaneously scored from OP9 stroma supplemented with 10 ng/ml SCF, 10 ng/ml Flt3L, and 10 ng/ml IL-7. Frequency and 95% confidence intervals for each individual sample were calculated using the WEHI limiting dilution analysis web interface. <http://bioinf.wehi.edu.au/software/limdil/>

**Table S2.** Limiting dilution analysis of wild-type and Ikaros–null HSC and LMPP cells. Data from at least two independent experiments is shown for each sample. Experiments and analysis were performed as in Table S1. Data from wild-type LMPP from

Experiment 2 was also used for Table S1 Experiment 2 as all experiments were performed simultaneously.

**Table S3.** Limiting dilution analysis of LMPPs transduced with Ikaros-targeted or scrambled shRNA expressing lentiviruses. Data from two independent experiments is shown. LMPPs were harvested and activated with SFEM supplemented with 50 ng/ml SCF, 50 ng/ml Flt3L, 20 ng/ml TPO, and 10 ng/ml IL-7 and cultured on retronectin coated tissue culture plates for 24 hours. Cells were then twice transduced with lentiviral supernatant and polybrene using a 2-hour spin-infection at approximately 2000g followed by a 10-hour culture before being washed and re-cultured in activation conditions for 12 hours. 60 hours after initiation of transduction, GFP positive cells were directly sorted into limiting dilution assays. Subsequent experiments and analysis were performed as with Table S1.

**Table S4.** The list of primers used for single cell multiplex RT-PCR and qPCR analysis of progenitors.

## Figure S1

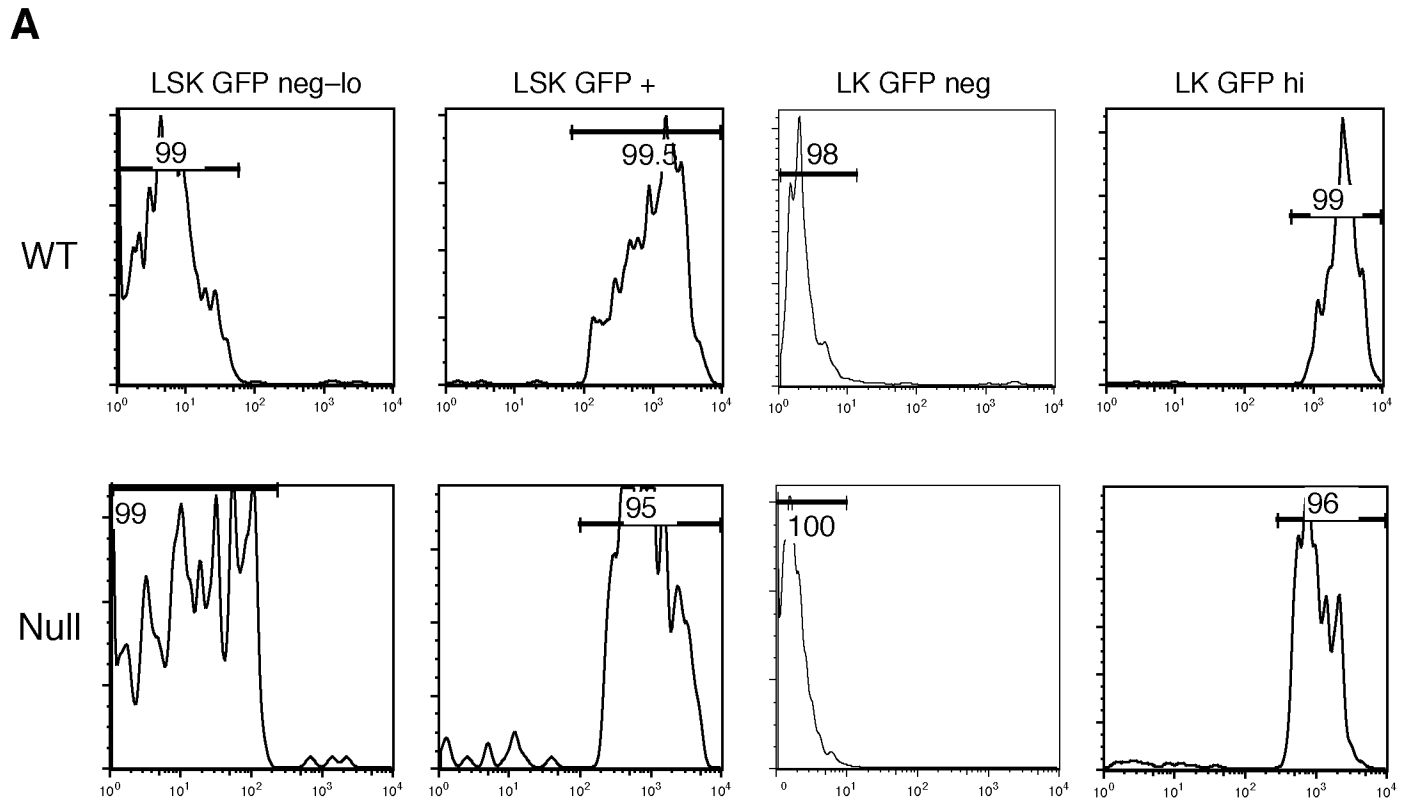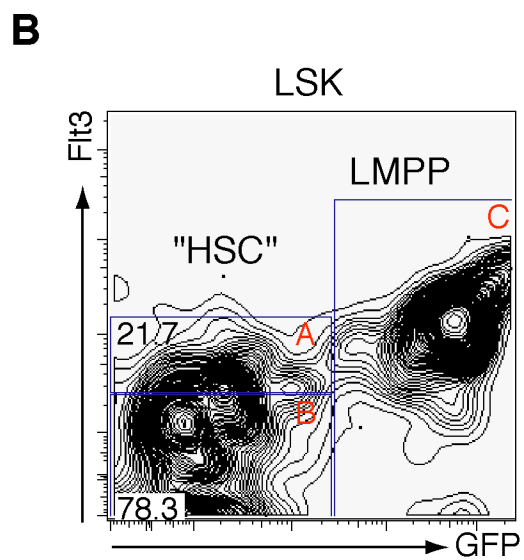

Figure S2

[F] Supplemental Text and Figures

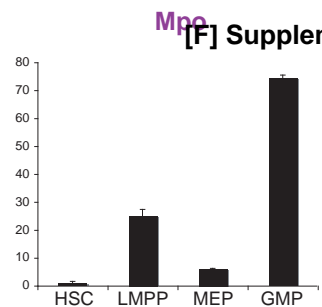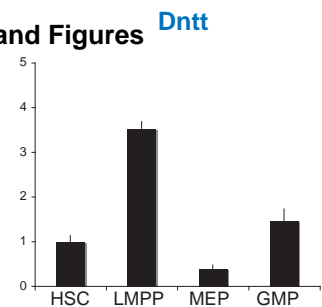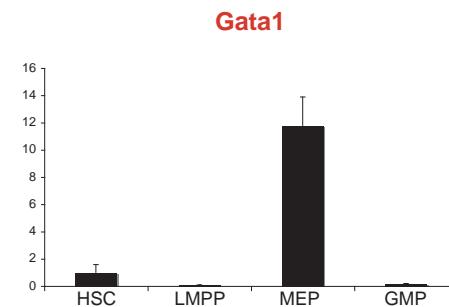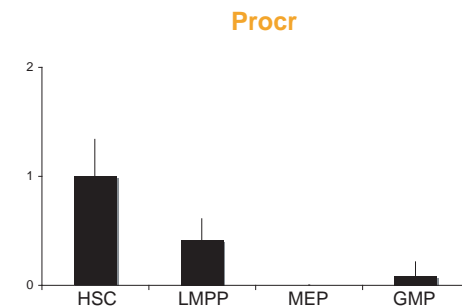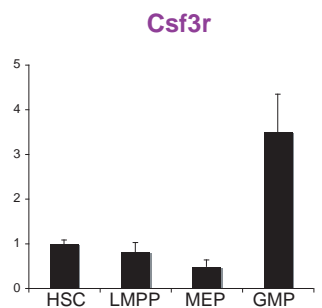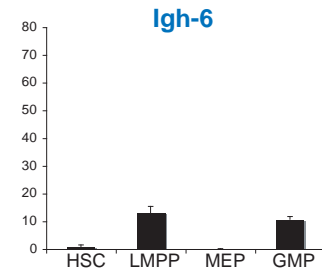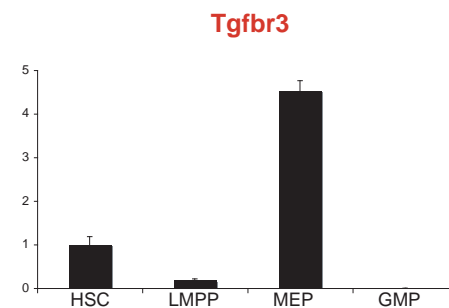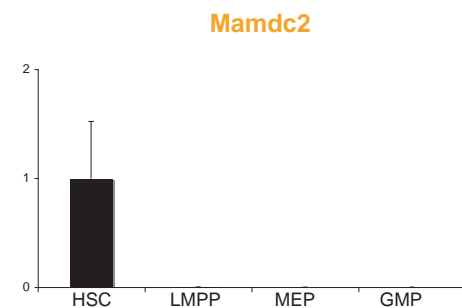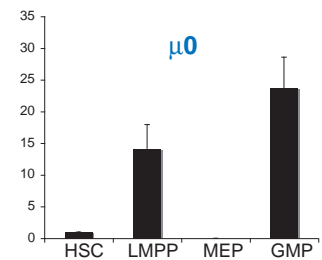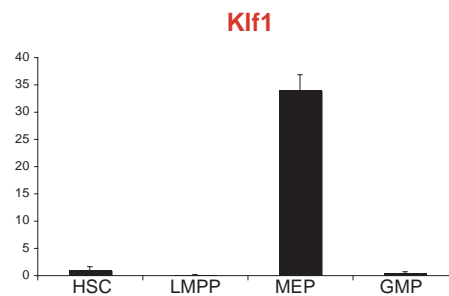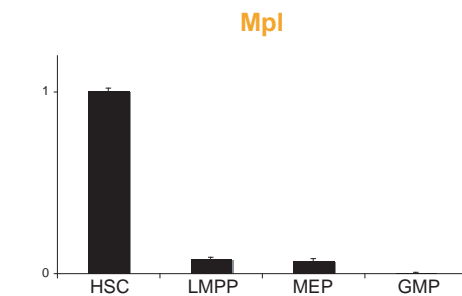

## Figure S3

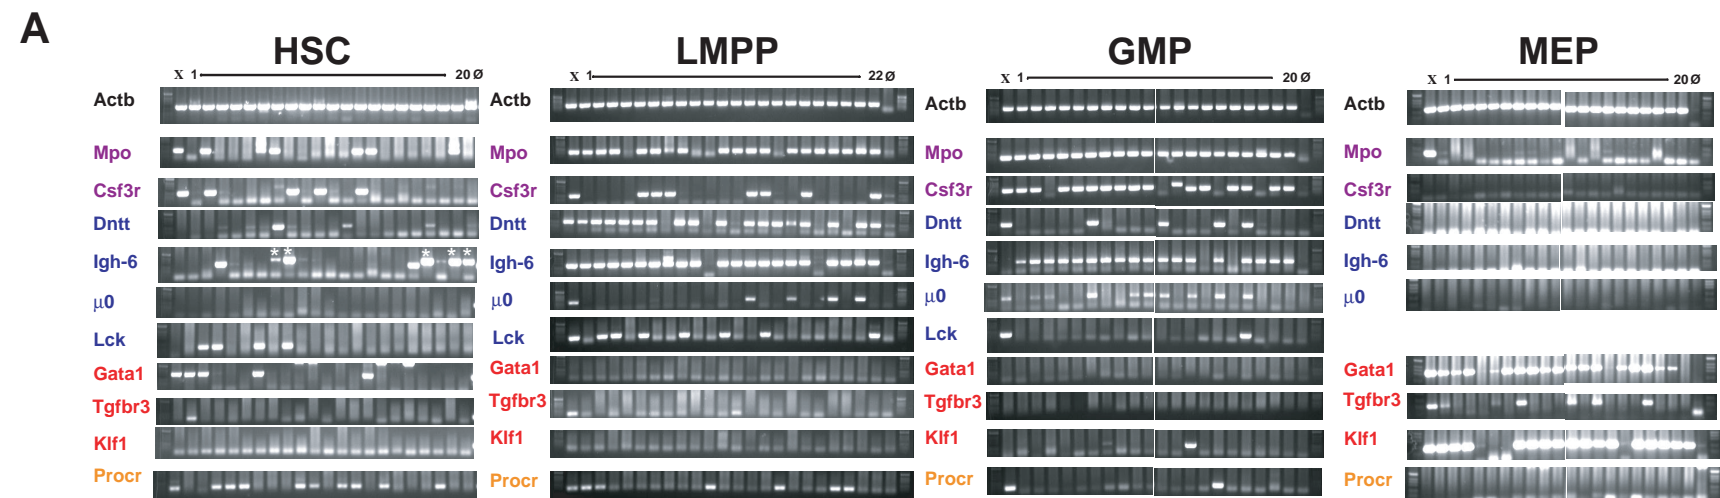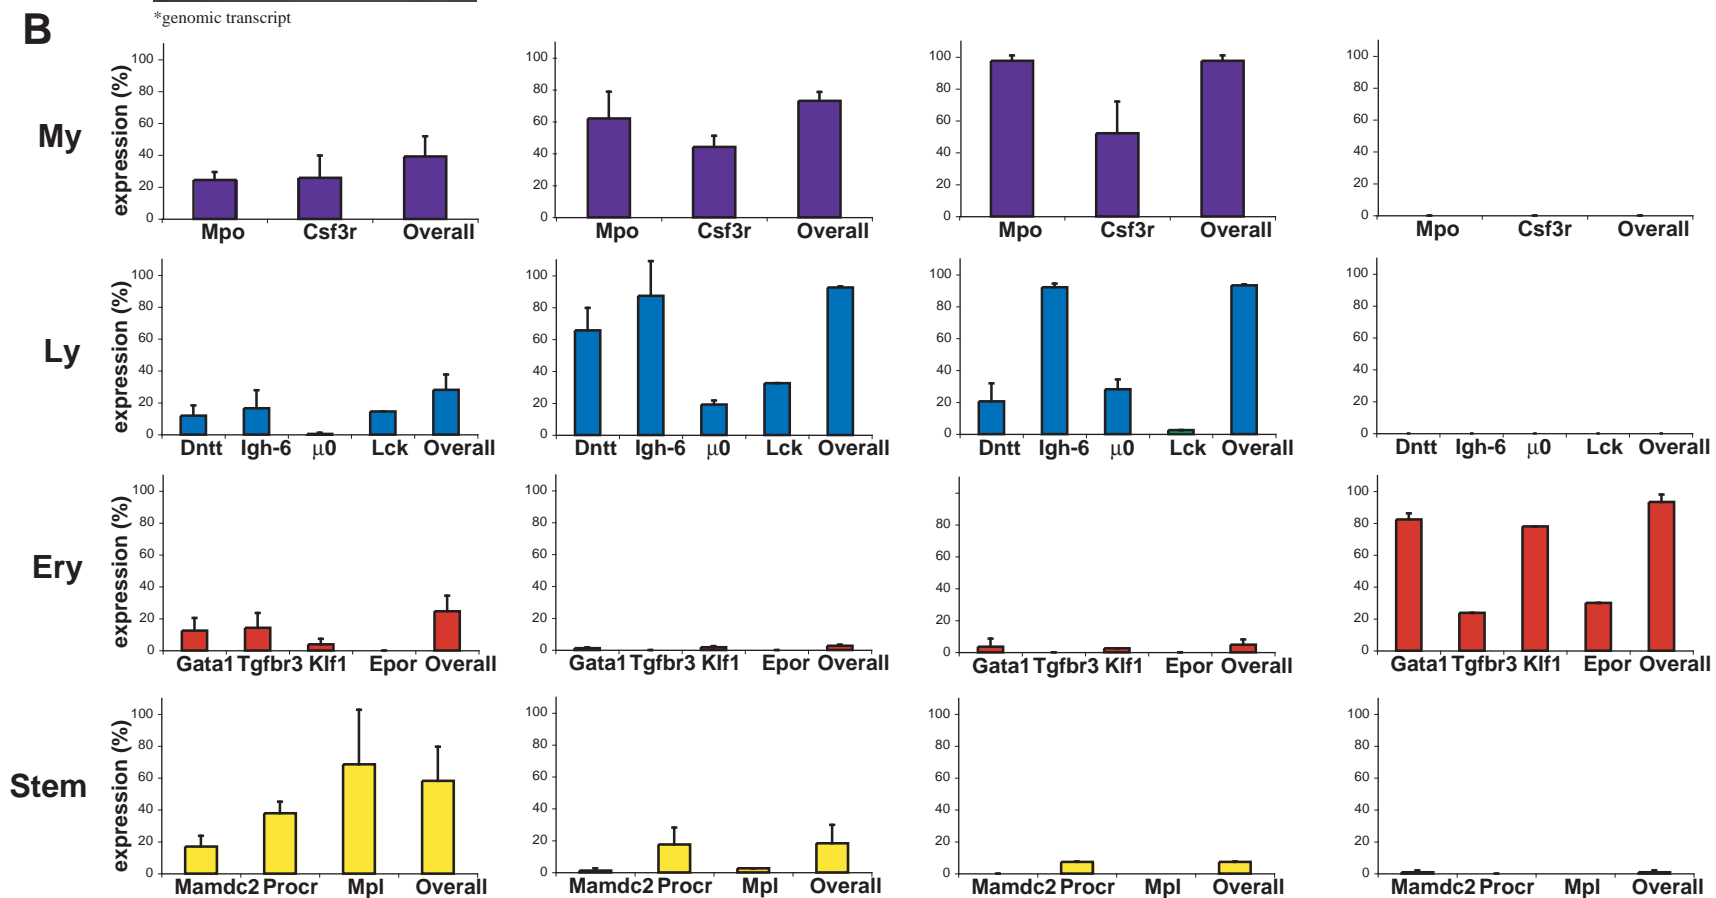

**Figure S4**

**A**

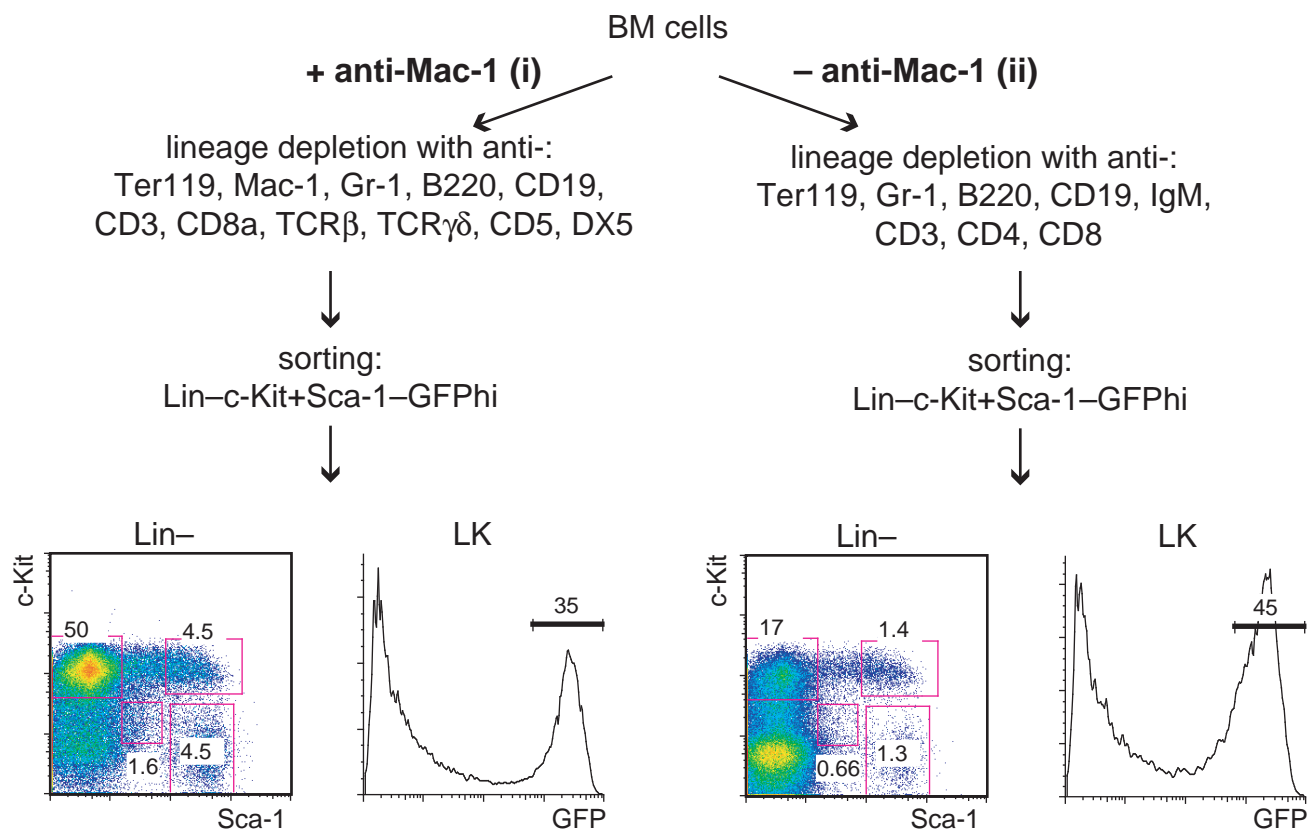

**B**

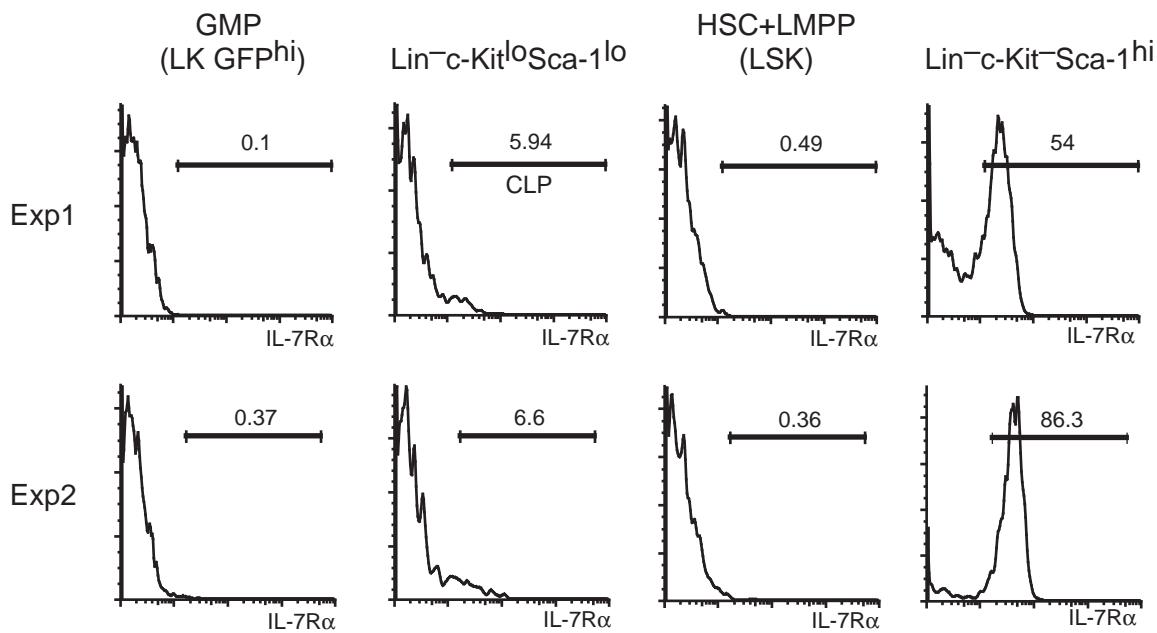



# Figure S5

**A**

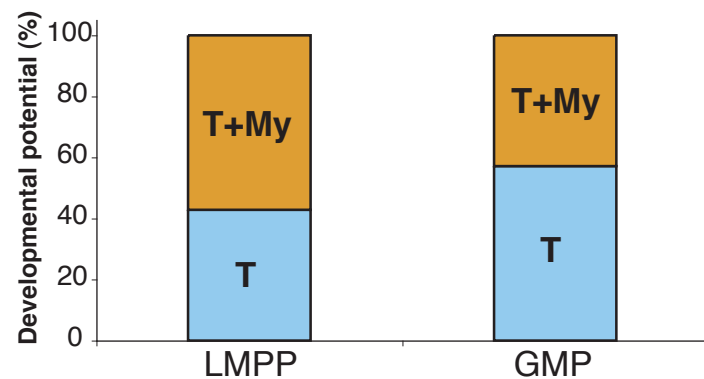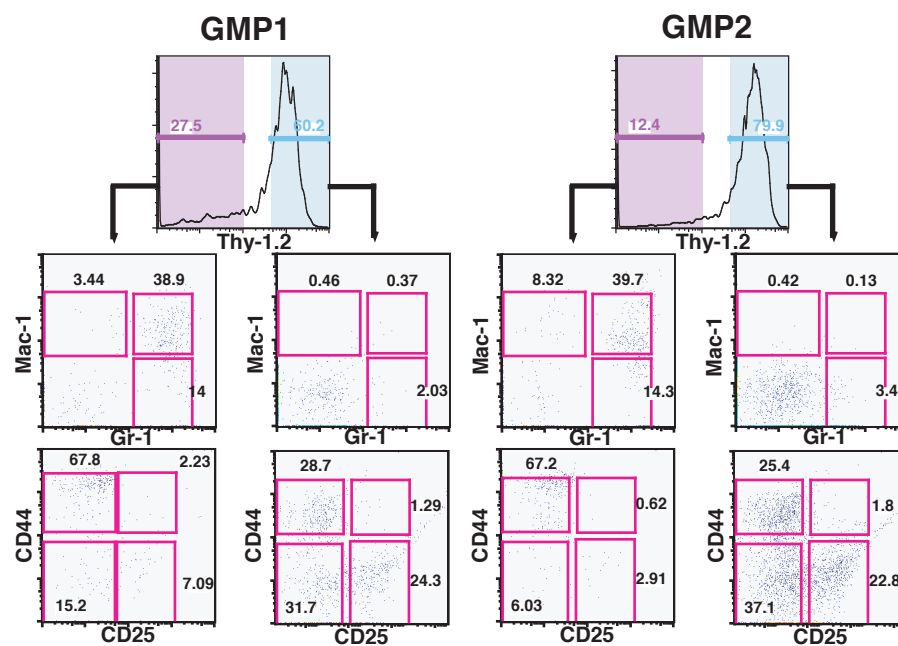

**B**

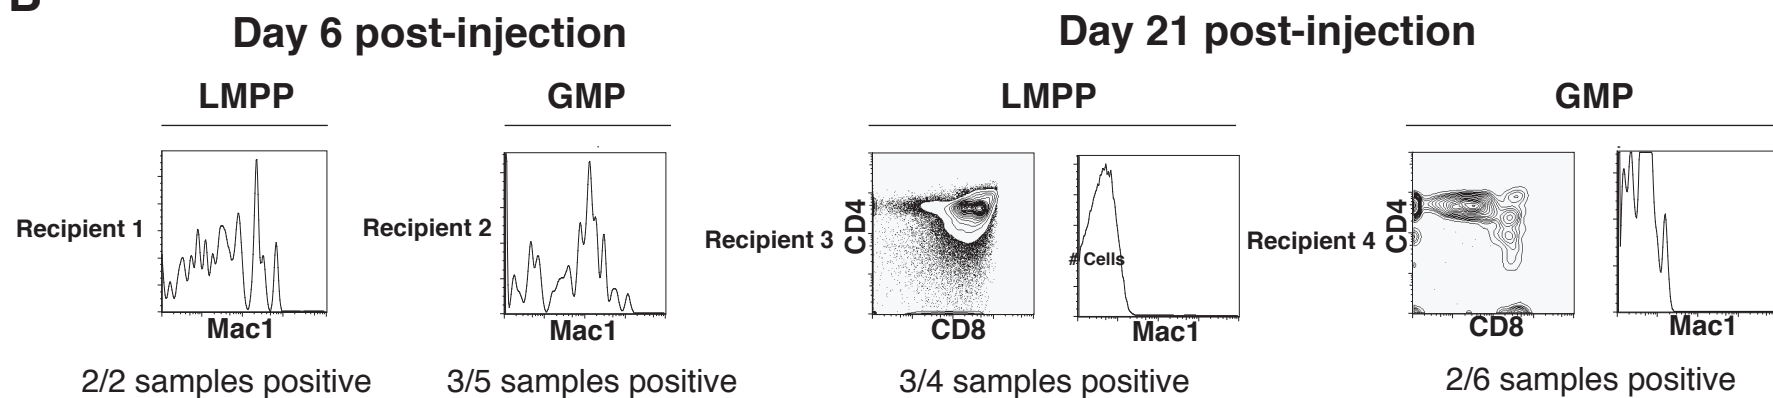

Figure S6

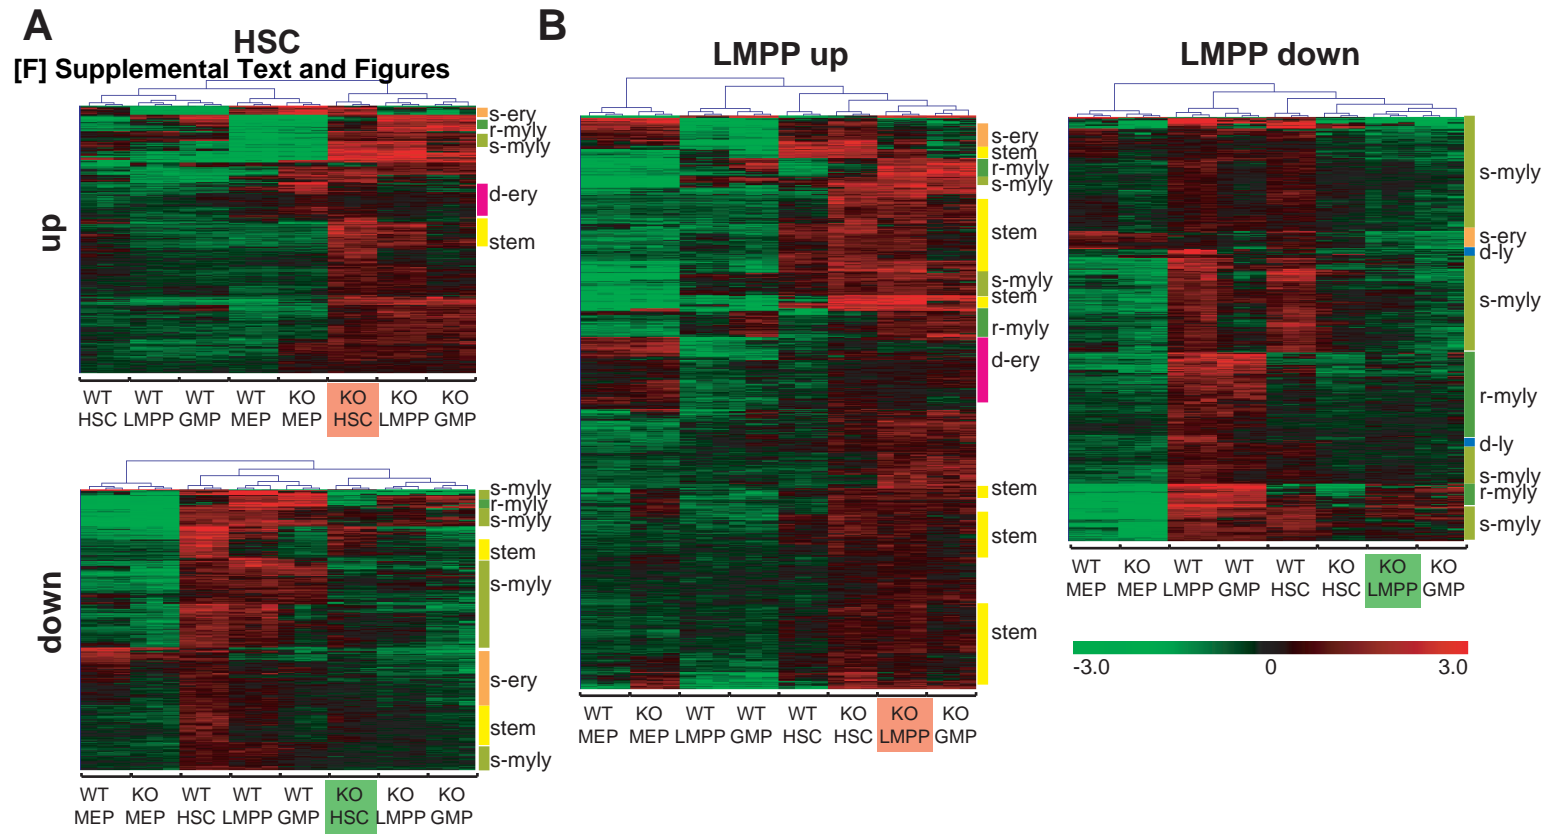

**Figure S7**

**A**

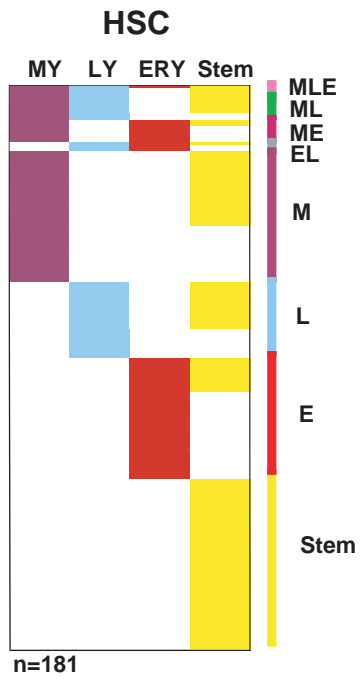

**B**

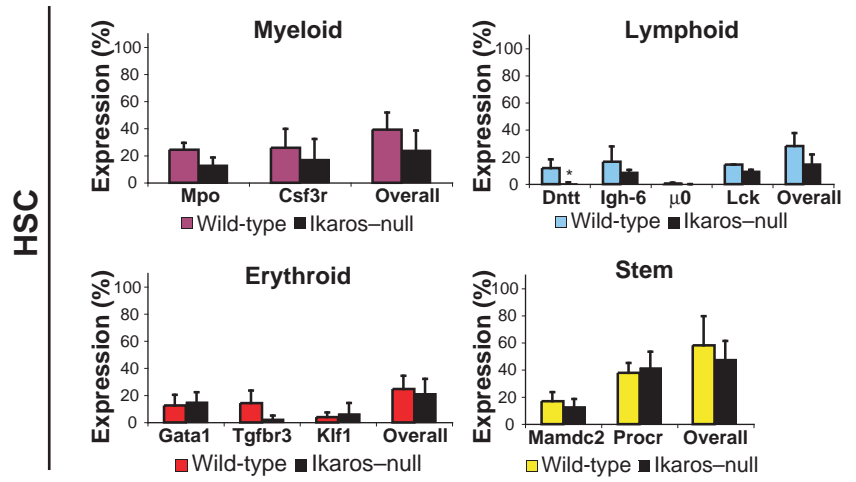

# Table S1

**Experiment 1**

**OP9-DL1**

95 percent Confidence Intervals

| LMPP | Cells/well | Responses | Lower      | Estimate   | Upper     |
|------|------------|-----------|------------|------------|-----------|
|      | 25         | 10/10     | 1 in 4.25  | 1 in 2.91  | 1 in 2.07 |
|      | 5          | 18/20     |            |            |           |
|      | 1          | 6/20      |            |            |           |
| GMP  | Cells/well | Responses | Lower      | Estimate   | Upper     |
|      | 100        | 10/10     | 1 in 25.10 | 1 in 14.81 | 1 in 8.82 |
|      | 20         | 7/10      |            |            |           |
|      | 4          | 6/20      |            |            |           |
|      | 1          | 1/20      |            |            |           |

**OP9-B**

95 percent Confidence Intervals

| LMPP | Cells/well | Responses | Lower       | Estimate    | Upper       |
|------|------------|-----------|-------------|-------------|-------------|
|      | 25         | 10/10     | 1 in 4.77   | 1 in 2.99   | 1 in 1.98   |
|      | 5          | 8/10      |             |             |             |
|      | 1          | 1/20      |             |             |             |
| GMP  | Cells/well | Responses | Lower       | Estimate    | Upper       |
|      | 500        | 8/10      | 1 in 642.55 | 1 in 347.64 | 1 in 188.19 |
|      | 100        | 3/10      |             |             |             |
|      | 20         | 0/20      |             |             |             |
|      | 4          | 0/20      |             |             |             |

**OP9-Myeloid**

95 percent Confidence Intervals

| LMPP | Cells/well | Responses | Lower      | Estimate   | Upper      |
|------|------------|-----------|------------|------------|------------|
|      | 25         | 10/10     | 1 in 7.04  | 1 in 4.20  | 1 in 2.60  |
|      | 5          | 6/10      |            |            |            |
|      | 1          | 7/20      |            |            |            |
| GMP  | Cells/well | Responses | Lower      | Estimate   | Upper      |
|      | 500        | 10/10     | 1 in 59.74 | 1 in 36.52 | 1 in 22.41 |
|      | 100        | 10/10     |            |            |            |
|      | 20         | 8/20      |            |            |            |
|      | 4          | 1/20      |            |            |            |

**Experiment 2**

**OP9-DL1**

95 percent Confidence Intervals

| LMPP | Cells/well | Responses | Lower      | Estimate   | Upper      |
|------|------------|-----------|------------|------------|------------|
|      | 25         | 10/10     | 1 in 12.47 | 1 in 7.17  | 1 in 4.23  |
|      | 5          | 6/10      |            |            |            |
|      | 1          | 1/20      |            |            |            |
| GMP  | Cells/well | Responses | Lower      | Estimate   | Upper      |
|      | 100        | 10/10     | 1 in 36.53 | 1 in 21.00 | 1 in 12.16 |
|      | 20         | 7/10      |            |            |            |
|      | 4          | 3/20      |            |            |            |
|      | 1          | 0/20      |            |            |            |

95 percent Confidence Intervals

| LMPP | Cells/well | Responses | Lower       | Estimate    | Upper      |
|------|------------|-----------|-------------|-------------|------------|
|      | 25         | 10/10     | 1 in 18.62  | 1 in 10.63  | 1 in 6.17  |
|      | 5          | 2/10      |             |             |            |
|      | 1          | 2/20      |             |             |            |
| GMP  | Cells/well | Responses | Lower       | Estimate    | Upper      |
|      | 500        | 10/10     | 1 in 292.88 | 1 in 165.87 | 1 in 94.03 |
|      | 100        | 4/10      |             |             |            |
|      | 20         | 1/20      |             |             |            |
|      | 4          | 1/20      |             |             |            |

95 percent Confidence Intervals

| LMPP | Cells/well | Responses | Lower      | Estimate   | Upper      |
|------|------------|-----------|------------|------------|------------|
|      | 25         | 10/10     | 1 in 4.39  | 1 in 2.79  | 1 in 1.87  |
|      | 5          | 9/10      |            |            |            |
|      | 1          | 7/20      |            |            |            |
| GMP  | Cells/well | Responses | Lower      | Estimate   | Upper      |
|      | 500        | 10/10     | 1 in 59.74 | 1 in 36.52 | 1 in 22.41 |
|      | 100        | 10/10     |            |            |            |
|      | 20         | 8/20      |            |            |            |
|      | 4          | 1/20      |            |            |            |

**Experiment 3**

**OP9-DL1**

95 percent Confidence Intervals

| LMPP | Cells/well | Responses | Lower      | Estimate   | Upper      |
|------|------------|-----------|------------|------------|------------|
|      | 25         | 5/5       | 1 in 3.32  | 1 in 2.19  | 1 in 1.55  |
|      | 5          | 10/10     |            |            |            |
|      | 1          | 8/20      |            |            |            |
| GMP  | Cells/well | Responses | Lower      | Estimate   | Upper      |
|      | 100        | 9/10      | 1 in 71.05 | 1 in 40.41 | 1 in 23.08 |
|      | 20         | 3/10      |            |            |            |
|      | 4          | 4/20      |            |            |            |
|      | 1          | 0/20      |            |            |            |

**Experiment 4**

95 percent Confidence Intervals

| GMP | Cells/well | Responses | Lower       | Estimate   | Higher      |
|-----|------------|-----------|-------------|------------|-------------|
|     | 200        | 8/20      | 1 in 628.63 | 1 in 353.6 | 1 in 198.90 |
|     | 50         | 3/20      |             |            |             |
|     | 10         | 1/20      |             |            |             |

95 percent Confidence Intervals

| GMP | Cells/well | Responses | Lower      | Estimate   | Higher     |
|-----|------------|-----------|------------|------------|------------|
|     | 200        | 19/20     | 1 in 84.78 | 1 in 55.65 | 1 in 36.53 |
|     | 50         | 11/20     |            |            |            |
|     | 10         | 6/20      |            |            |            |

## Table S2

## Experiment 1

|           |            | OP9-DL1   |            |            |           |
|-----------|------------|-----------|------------|------------|-----------|
| Wild Type | Cells/well | Responses | Lower      | Estimate   | Higher    |
| HSC       | 25         | 10/10     | 1 in 17.36 | 1 in 10.69 | 1 in 6.67 |
|           | 5          | 5/20      |            |            |           |
|           | 1          | 3/20      |            |            |           |
| Wild Type | Cells/well | Responses | Lower      | Estimate   | Higher    |
| LMPP      | 25         | 10/10     | 1 in 2.24  | 1 in 1.6   | 1 in 1.25 |
|           | 5          | 20/20     |            |            |           |
|           | 1          | 12/20     |            |            |           |

|             |            | OP9-DL1   |            |            |            |
|-------------|------------|-----------|------------|------------|------------|
| Ikaros-null | Cells/well | Responses | Lower      | Estimate   | Higher     |
| HSC         | 25         | 5/10      | 1 in 48.5  | 1 in 26.34 | 1 in 14.41 |
|             | 5          | 5/20      |            |            |            |
|             | 1          | 1/20      |            |            |            |
| Ikaros-null | Cells/well | Responses | Lower      | Estimate   | Higher     |
| LMPP        | 25         | 8/10      | 1 in 28.85 | 1 in 16.92 | 1 in 10.01 |
|             | 5          | 6/20      |            |            |            |
|             | 1          | 0/20      |            |            |            |

## Experiment 2

|           |            | OP9-DL1   |           |           |           |
|-----------|------------|-----------|-----------|-----------|-----------|
| Wild Type | Cells/well | Responses | Lower     | Estimate  | Higher    |
| LMPP      | 25         | 10/10     | 1 in 4.25 | 1 in 2.91 | 1 in 2.07 |
|           | 5          | 18/20     |           |           |           |
|           | 1          | 6/20      |           |           |           |

|             |            | OP9-DL1   |            |            |            |
|-------------|------------|-----------|------------|------------|------------|
| Ikaros-null | Cells/well | Responses | Lower      | Estimate   | Higher     |
| HSC         | 25         | 4/10      | 1 in 79.21 | 1 in 39.07 | 1 in 19.40 |
|             | 5          | 2/20      |            |            |            |
|             | 1          | 2/20      |            |            |            |
| Ikaros-null | Cells/well | Responses | Lower      | Estimate   | Higher     |
| LMPP        | 25         | 6/10      | 1 in 40.47 | 1 in 22.64 | 1 in 12.77 |
|             | 5          | 6/20      |            |            |            |
|             | 1          | 0/20      |            |            |            |

## Experiment 3

|           |            | OP9-DL1   |            |            |            |
|-----------|------------|-----------|------------|------------|------------|
| Wild Type | Cells/well | Responses | Lower      | Estimate   | Higher     |
| HSC       | 30         | 7/10      | 1 in 42.71 | 1 in 23.85 | 1 in 13.42 |
|           | 10         | 4/10      |            |            |            |
|           | 3          | 1/10      |            |            |            |
| Wild Type | Cells/well | Responses | Lower      | Estimate   | Higher     |
| LMPP      | 30         | 10/10     | 1 in 4.18  | 1 in 2.35  | 1 in 1.48  |
|           | 10         | 10/10     |            |            |            |
|           | 3          | 8/10      |            |            |            |

## Experiment 4

|           |            | OP9-DL1   |             |            |            |
|-----------|------------|-----------|-------------|------------|------------|
| Wild Type | Cells/well | Responses | Lower       | Estimate   | Higher     |
| HSC       | 10         | 2/10      | 1 in 111.48 | 1 in 42.01 | 1 in 16.03 |
|           | 5          | 1/10      |             |            |            |
|           | 2          | 1/10      |             |            |            |
|           | 1          | 0/10      |             |            |            |
| Wild Type | Cells/well | Responses | Lower       | Estimate   | Higher     |
| LMPP      | 10         | 10/10     | 1 in 7.58   | 1 in 4.95  | 1 in 3.31  |
|           | 5          | 7/10      |             |            |            |
|           | 2          | 3/10      |             |            |            |
|           | 1          | 1/10      |             |            |            |

## Experiment 5

|           |            | OP9-DL1   |            |            |           |
|-----------|------------|-----------|------------|------------|-----------|
| Wild Type | Cells/well | Responses | Lower      | Estimate   | Higher    |
| HSC       | 25         | 9/10      | 1 in 21.92 | 1 in 12.62 | 1 in 7.37 |
|           | 5          | 4/10      |            |            |           |
|           | 2          | 1/10      |            |            |           |
|           | 1          | 0/10      |            |            |           |
| Wild Type | Cells/well | Responses | Lower      | Estimate   | Higher    |
| LMPP      | 25         | 10/10     | 1 in 2.69  | 1 in 1.86  | 1 in 1.38 |
|           | 5          | 10/10     |            |            |           |
|           | 2          | 7/10      |            |            |           |
|           | 1          | 6/10      |            |            |           |

# Table S3

Experiment 1

OP9 B cell

| Ikaros shRNA 1 | Cells/well | Responses | Lower       | Estimate   | Higher     |
|----------------|------------|-----------|-------------|------------|------------|
|                | 50         | 5/20      | 1 in 115.78 | 1 in 67.66 | 1 in 39.54 |
|                | 10         | 1/20      |             |            |            |
|                | 2          | 1/20      |             |            |            |

| Ikaros shRNA 2 | Cells/well | Responses | Lower      | Estimate   | Higher    |
|----------------|------------|-----------|------------|------------|-----------|
|                | 50         | 13/20     | 1 in 20.17 | 1 in 12.94 | 1 in 8.30 |
|                | 10         | 9/20      |            |            |           |
|                | 2          | 6/20      |            |            |           |

| Control shRNA | Cells/well | Responses | Lower     | Estimate  | Higher    |
|---------------|------------|-----------|-----------|-----------|-----------|
|               | 50         | 19/20     | 1 in 7.90 | 1 in 5.05 | 1 in 3.22 |
|               | 10         | 12/20     |           |           |           |
|               | 2          | 6/20      |           |           |           |

OP9 Myeloid

| Ikaros shRNA 1 | Cells/well | Responses | Lower     | Estimate | Higher    |
|----------------|------------|-----------|-----------|----------|-----------|
|                | 50         | 20/20     | 1 in 4.05 | 1 in 2.5 | 1 in 1.54 |
|                | 10         | 20/20     |           |          |           |
|                | 2          | 10/10     |           |          |           |

| Ikaros shRNA 2 | Cells/well | Responses | Lower    | Estimate  | Higher    |
|----------------|------------|-----------|----------|-----------|-----------|
|                | 50         | 20/20     | 1 in 6.5 | 1 in 4.14 | 1 in 2.64 |
|                | 10         | 20/20     |          |           |           |
|                | 2          | 7/20      |          |           |           |

| Control shRNA | Cells/well | Responses | Lower       | Estimate   | Higher     |
|---------------|------------|-----------|-------------|------------|------------|
|               | 50         | 4/20      | 1 in 115.81 | 1 in 67.67 | 1 in 39.54 |
|               | 10         | 8/20      |             |            |            |
|               | 2          | 4/20      |             |            |            |

OP9-DL1

| Ikaros shRNA 1 | Cells/well | Responses | Lower      | Estimate  | Higher    |
|----------------|------------|-----------|------------|-----------|-----------|
|                | 50         | 20/20     | 1 in 14.46 | 1 in 9.35 | 1 in 6.12 |
|                | 10         | 12/20     |            |           |           |
|                | 2          | 6/20      |            |           |           |

| Ikaros shRNA 2 | Cells/well | Responses | Lower      | Estimate   | Higher    |
|----------------|------------|-----------|------------|------------|-----------|
|                | 50         | 19/19     | 1 in 16.38 | 1 in 10.57 | 1 in 6.90 |
|                | 10         | 14/20     |            |            |           |
|                | 2          | 1/20      |            |            |           |

| Control shRNA | Cells/well | Responses | Lower     | Estimate  | Higher    |
|---------------|------------|-----------|-----------|-----------|-----------|
|               | 50         | 20/20     | 1 in 5.81 | 1 in 3.87 | 1 in 2.65 |
|               | 10         | 19/20     |           |           |           |
|               | 2          | 10/20     |           |           |           |

Experiment 2

OP9 B cell

| Ikaros shRNA 1 | Cells/well | Responses | Lower      | Estimate   | Higher     |
|----------------|------------|-----------|------------|------------|------------|
|                | 25         | 3/10      | 1 in 80.16 | 1 in 39.22 | 1 in 19.32 |
|                | 5          | 5/20      |            |            |            |
|                | 1          | 0/20      |            |            |            |

| Ikaros shRNA 2 | Cells/well | Responses | Lower     | Estimate   | Higher     |
|----------------|------------|-----------|-----------|------------|------------|
|                | 25         | 6/10      | 1 in 30.7 | 1 in 17.86 | 1 in 10.49 |
|                | 5          | 6/20      |           |            |            |
|                | 1          | 3/20      |           |            |            |

| Control shRNA | Cells/well | Responses | Lower      | Estimate  | Higher    |
|---------------|------------|-----------|------------|-----------|-----------|
|               | 25         | 10/10     | 1 in 10.86 | 1 in 6.89 | 1 in 4.45 |
|               | 5          | 11/20     |            |           |           |
|               | 1          | 2/20      |            |           |           |

OP9 Myeloid

| Ikaros shRNA 1 | Cells/well | Responses | Lower     | Estimate  | Higher    |
|----------------|------------|-----------|-----------|-----------|-----------|
|                | 25         | 10/10     | 1 in 7.15 | 1 in 4.63 | 1 in 3.08 |
|                | 5          | 14/20     |           |           |           |
|                | 1          | 3/20      |           |           |           |

| Ikaros shRNA 2 | Cells/well | Responses | Lower     | Estimate  | Higher    |
|----------------|------------|-----------|-----------|-----------|-----------|
|                | 25         | 10/10     | 1 in 9.51 | 1 in 6.08 | 1 in 3.97 |
|                | 5          | 11/20     |           |           |           |
|                | 1          | 4/20      |           |           |           |

| Control shRNA | Cells/well | Responses | Lower       | Estimate   | Higher     |
|---------------|------------|-----------|-------------|------------|------------|
|               | 25         | 0/10      | 1 in 251.28 | 1 in 90.98 | 1 in 33.14 |
|               | 5          | 3/20      |             |            |            |
|               | 1          | 1/20      |             |            |            |

OP9-DL1

| Ikaros shRNA 1 | Cells/well | Responses | Lower     | Estimate | Higher    |
|----------------|------------|-----------|-----------|----------|-----------|
|                | 25         | 9/9       | 1 in 9.67 | 1 in 6   | 1 in 3.81 |
|                | 5          | 10/17     |           |          |           |
|                | 1          | 3/19      |           |          |           |

| Ikaros shRNA 2 | Cells/well | Responses | Lower      | Estimate   | Higher     |
|----------------|------------|-----------|------------|------------|------------|
|                | 25         | 8/10      | 1 in 29.18 | 1 in 17.09 | 1 in 10.10 |
|                | 5          | 5/20      |            |            |            |
|                | 1          | 1/20      |            |            |            |

| Control shRNA | Cells/well | Responses | Lower     | Estimate  | Higher    |
|---------------|------------|-----------|-----------|-----------|-----------|
|               | 25         | 10/10     | 1 in 5.15 | 1 in 3.45 | 1 in 2.40 |
|               | 5          | 16/19     |           |           |           |
|               | 1          | 5/20      |           |           |           |

**SC-PCR primers**

Actb Flanking S  
 Actb Flanking A  
 Actb Nested S  
 Actb Nested A

**Lymphoid**

Igh-6 Flanking S  
 Igh-6 Flanking A  
 Igh-6 Nested S  
 Igh-6 Nested A  
 Lck Flanking S  
 Lck Flanking A  
 Lck Nested S  
 Lck Nested A  
 Dntt Flanking S  
 Dntt Flanking A  
 Dntt Nested S  
 Dntt Nested A  
 Sterile IgH ( $\mu$ 0)-1  
 Sterile IgH ( $\mu$ 0)-2  
 Sterile IgH ( $\mu$ 0)-3  
 Sterile IgH ( $\mu$ 0)-4

**Myeloid**

Mpo Flanking S  
 Mpo Flanking A  
 Mpo Nested S  
 Mpo Nested A  
 Csf3r-1  
 Csf3r-2  
 Csf3r-3  
 Csf3r-4

**Erythroid**

Tgfr3 Flanking S  
 Tgfr3 Flanking A  
 Tgfr3 Nested S  
 Tgfr3 Nested A  
 Klf1 Flanking S  
 Klf1 Flanking A  
 Klf1 Nested S  
 Klf1 Nested A  
 Gata1-1  
 Gata1-2  
 Gata1-3  
 Gata1-4

**Stem**

Mamdc2 Flanking S  
 Mamdc2 Flanking A  
 Mamdc2 Nested S  
 Mamdc2 Nested A  
 Procr Flanking S  
 Procr Flanking A  
 Procr Nested S

**Sequence**

GCTACAGCTTCACCACCACA  
 CTTCTGCATCCTGTCAGCAA  
 AATCGTGCCTGACATCAAAGAG  
 ACGGATGTCAACGTCACACTTC

CGTCCAAGAATTGGATGTGA  
 AGGGACACGAGCTCATTGAG  
 GTTCAGATGCCAGCCTCACA  
 TGGGGTGGGAAGGTGTTCA  
 TGCAAGATTGCAGACTTTGG  
 CCACACAGATATGGCACAGG  
 CAAGTCAGACGTGTGGTCCTTC  
 CACAGCATCATGAGGTGGTACA  
 CTGTGTTTGGTGTGGGACTG  
 CTGGGCTGCTTGAACCTTTTC  
 AGCTGTGTGAACAGGCCAGAAG  
 CCCTGCTGCTTCCAAAAGTCTG  
 GCTAGCCTGAAAGATTACC  
 TGAGTTTCTGAGGCTTGG  
 AGTAGCACAGTCTCTGTTCTGC  
 AAGGACTGACTCTCTGAGG

ATCAGCTGACCAAGGACCAG  
 TGGAAGCGTGTATTGATAGCC  
 CTTCTTCACTGGCCTCAACTGC  
 GCGAATGGTGTATGTTGTTCCCTG  
 ACAGGAGTGTGAACCTTCGCT  
 TACCAGCCACAGCTCAAAGG  
 ACGTGTCCAGTCTGATGGTG  
 TTGCTTCTTCTGACACCAGC

CCCCAGATGGTGTGGTTTAC  
 TCGGACAGATGTTCTCGATG  
 GCTCGATGGAAATGCTACCTTC  
 CAAATCCCAGATCTTGGTCAGC  
 ATTGTCTGGGACCTGGGACT  
 ACGCTTCATGTGCAGAGCTA  
 GGCGAACTTTGGCACCTAAGAG  
 GTCCAGTGTGCTTCCGGTAGTG  
 CCAGTTTGTGGATTCTGC  
 GTCCTCACCATCAGATTCC  
 AACGTGTTGTTGCTCTTCC  
 AAGAATAGGCTGCTGAGC

GCAGTACTGTGTGCGCTTTC  
 CTCCCTTGGGTCCTGTGTAG  
 GCAAGCGGAAATCAGTTTCAAG  
 ATTCTCCAGGTGGAGGTGGAAG  
 AAAACGTCAACATCCTCCAG  
 TGGTTCTCCAGGAACTCCAC  
 GCCTGGTGAAGCTGGTATATCG

**References**

Mansson **Immunity** 26:407-  
 Mansson **Immunity** 26:407-  
 Mansson **Immunity** 26:407-  
 Mansson **Immunity** 26:407-

Mansson **Immunity** 26:407-  
 Mansson **Immunity** 26:407-  
 Mansson **Immunity** 26:407-  
 Mansson **Immunity** 26:407-

Mansson **Immunity** 26:407-  
 Mansson **Immunity** 26:407-  
 Mansson **Immunity** 26:407-  
 Mansson **Immunity** 26:407-

Procr Nested A

Mpl-1

Mpl-2

Mpl-3

Mpl-4

TCGAAGAAGACATGGGGTTCAG

CGGGTGCTGTTTGTGGATAG

TGCTCTCCACAGAAACCTGC

AGTCACAGGGAAGGACCAGG

GCGGTTCCCTCCTTCACAT

Mansson **Immunity** 26:407-

Mansson **Immunity** 26:407-

Mansson **Immunity** 26:407-

Mansson **Immunity** 26:407-

**Realttime Primers**

Actb S

Actb A

Ikaros S

Ikaros A

Dntt S

Dntt A

Igh-6 S

Igh-6 A

μ0 (Sterile IgH)-S

μ0 (Sterile IgH)-A

Mpo S

Mpo A

Klf1 S

Klf1 A

Mamdc2 S

Mamdc2 A

Mpl S

Mpl A

Taqman Primer Sets

Gata1

Procr

Tgfbr3

CGTGAAAAGATGACCCAGATC

CACAGCCTGGATGGCTACGT

CAATGTGCCAAACGTAAGA

GTTGATGGCATTGTTGATGG

GAGGCGGTTGTGACATTTCT

GCTGCTGCTCTTCATCCTCT

TCTGCCTTCACCACAGAAGA

ACACAGCAGGTGGATGTTTG

CCTAAGGCAGGATGTGGAGA

AGACGAGGGGGAAGACATTT

CCTTCTTCACTGGCCTCAAC

GGTTCTTGATTTCGAGGGTCA

CAAGAGCTCGCACCTCAAG

GAAGGGACGATGTCCAGTGT

TACAGCTGCAGGAGGAGACA

TCCTGATGACTGTTTCAGTTGTATCT

CAGACCTACACCGGGTCCTA

GCTGGGTTCCACTTCTTCAC

Mm00484678\_m1

Mm00440992\_m1

Mm03024063\_m1



19  
19  
19  
19

19  
19  
19  
19

19  
19  
19  
19

19  
19  
19  
19
